# Supplementary material for: Utilisation of Chimeric Lyssaviruses to Assess Vaccine Protection against Highly Divergent Lyssaviruses
Source: PubMed Central journal article supplement (PMC5869523; doi:10.3390/v10030130), 2018-03-15

Evans et al., 2017 Supplementary figure 1

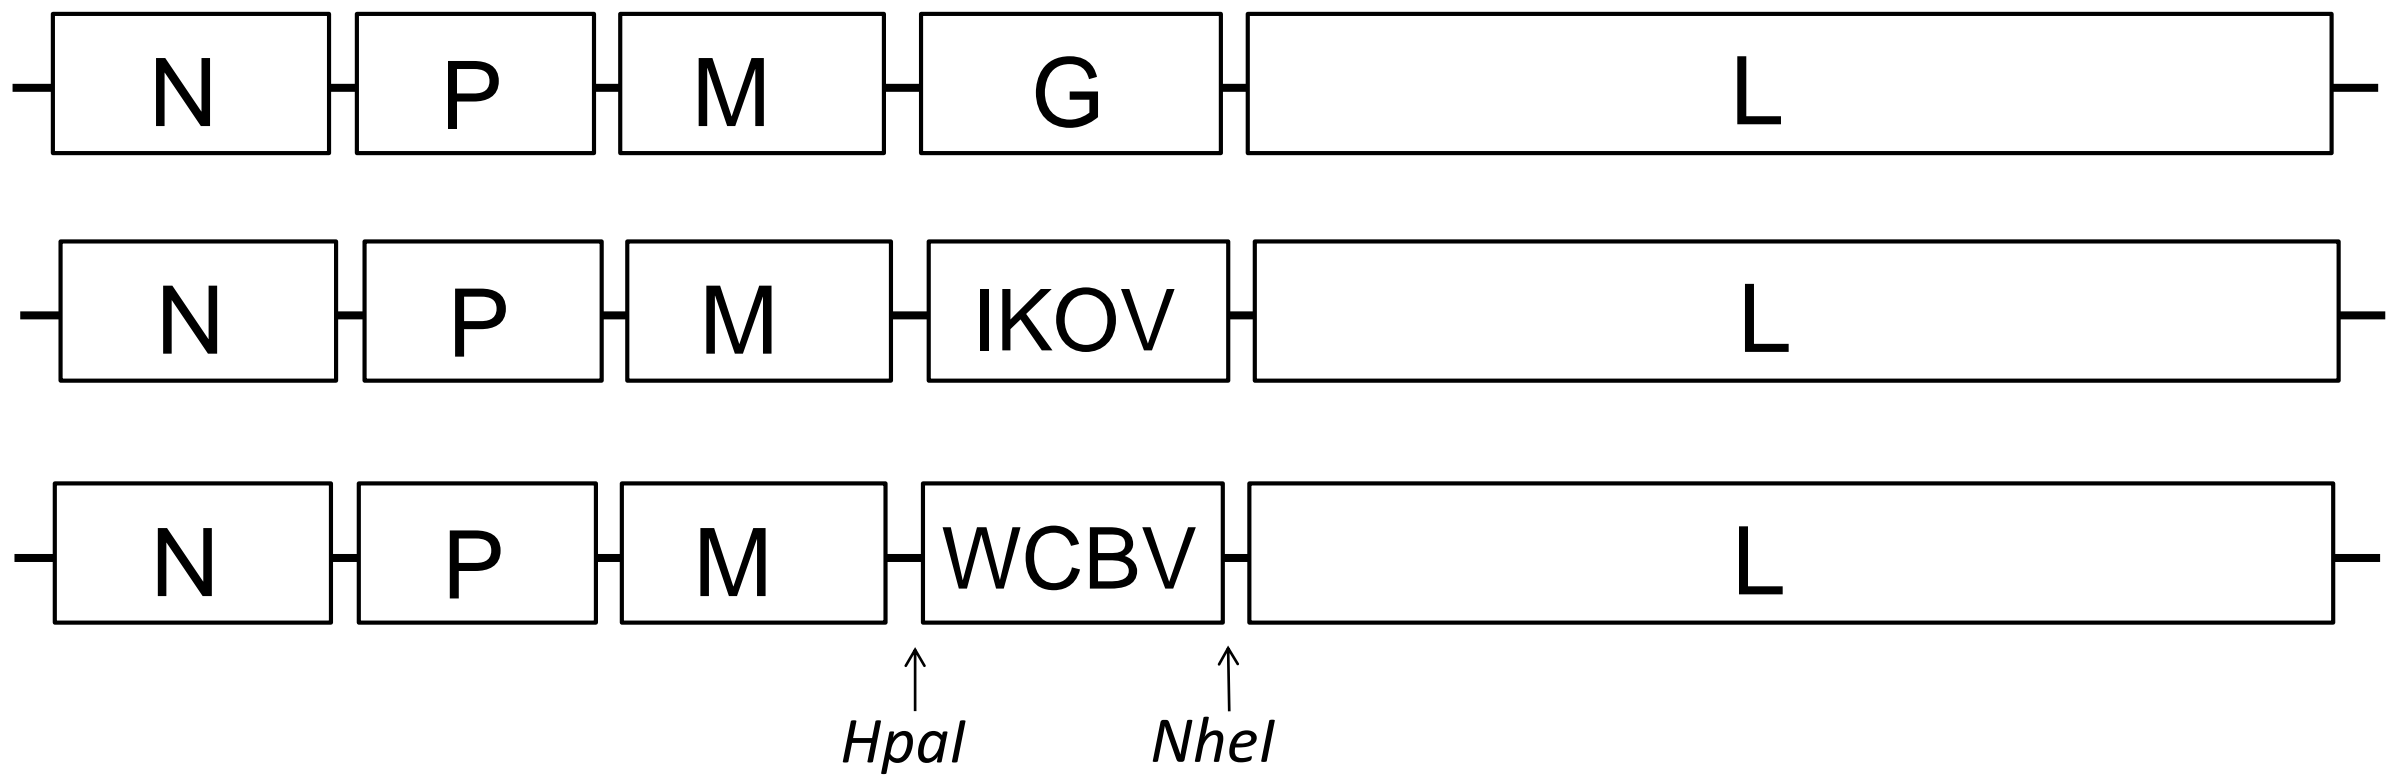

Evans et al., 2017- Supplementary file 2

a) IKOV

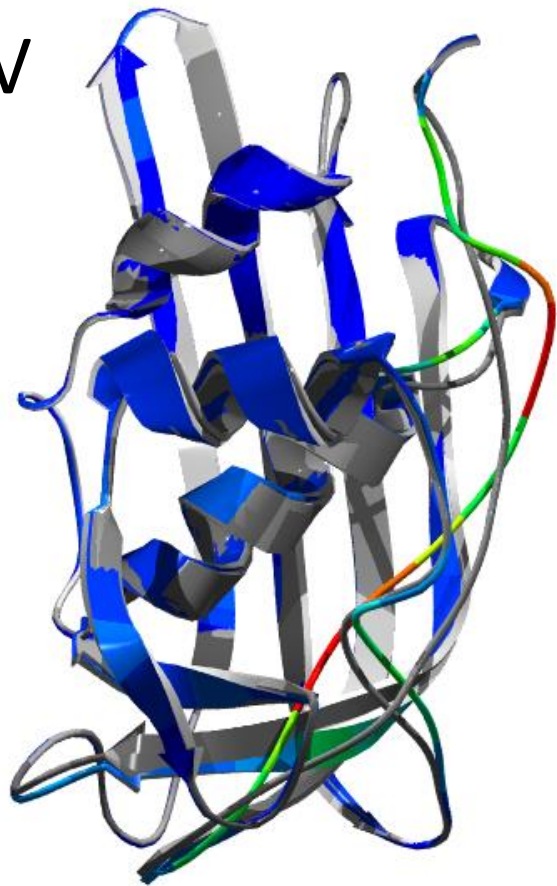

b) WCBV

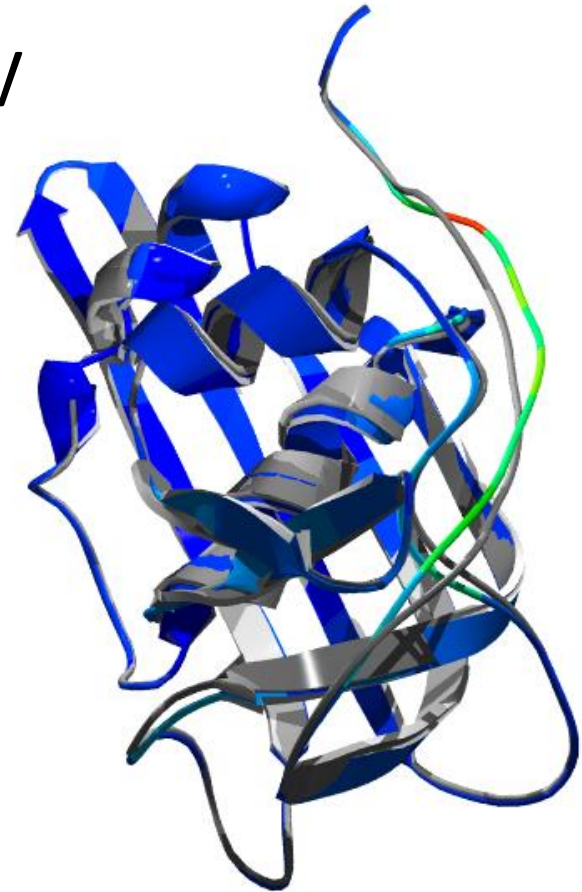

c) LLEBV

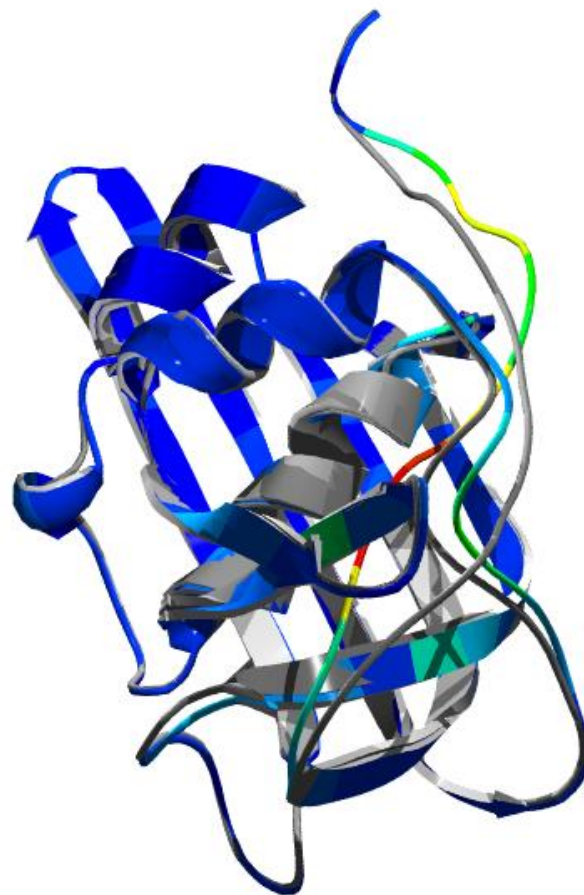

Supplement: viruses-10-00130-s001.pdf [file viruses-10-00130-s001.pdf]
